# Supplementary material
Source: publisher figshare collection journal article supplement (https://diabetesjournals.figshare.com/ndownloader/files/28979133)
Supplement: Supplementary file 1 [file 28979133]

**Sleeve gastrectomy suppresses hepatic glucose production and increases  
hepatic insulin clearance independent of weight-loss**

**Supplementary Information**

Rachel Ben-Haroush Schyr<sup>1\*</sup>, Abbas Al-Kurd<sup>2</sup>, Botros Moalem<sup>1</sup>, Anna Permyakova<sup>3</sup>, Hadar Israeli<sup>1</sup>, Aya Bardugo<sup>1</sup>, Liron Hefetz<sup>1</sup>, Michael Bergel<sup>1</sup>, Arnon Haran<sup>1</sup>, Shahar Azar<sup>3</sup>, Itia Magenheim<sup>1</sup>, Joseph Tam<sup>3</sup>, Ronit Grinbaum<sup>2</sup> and Danny Ben-Zvi<sup>1\*</sup>.

1. Department of Developmental Biology and Cancer Research, Institute for Medical Research Israel-Canada, Hadassah Medical School-the Hebrew University of Jerusalem, Jerusalem 9112001, Israel.
2. Department of Surgery, Hadassah Medical Center-Mt. Scopus, Jerusalem 9765422, Israel.
3. Obesity and Metabolism Laboratory, The Institute for Drug Research, School of Pharmacy, Faculty of Medicine, The Hebrew University of Jerusalem, Jerusalem 9112001, Israel.

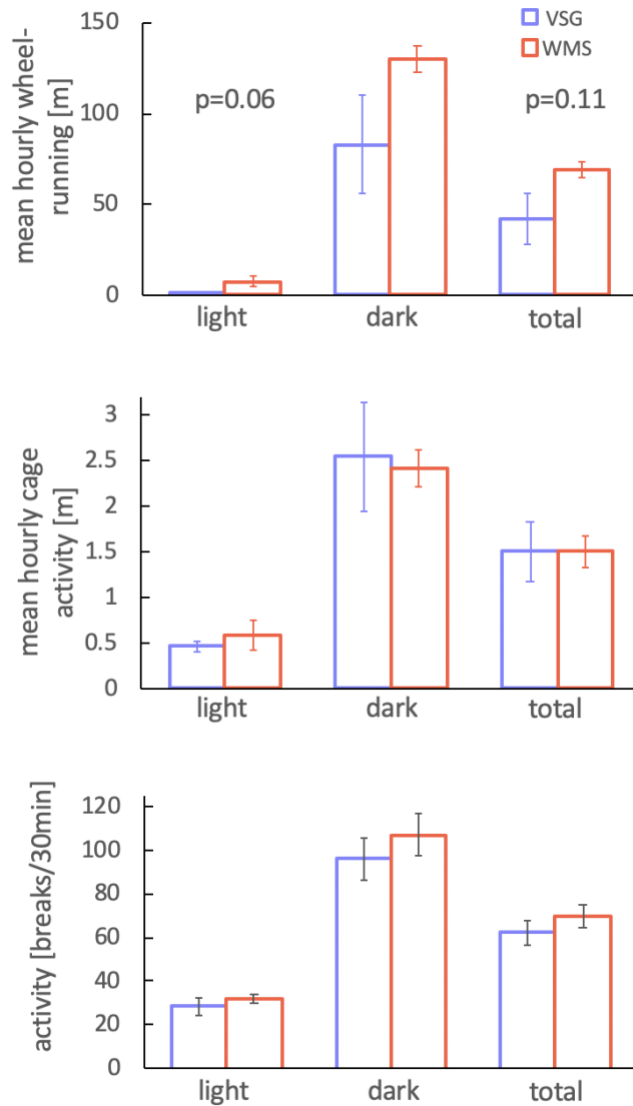

**Figure S1: Activity of VSG and WMS operated mice.**

A. Mean wheel running per hour in the light cycle (left), dark cycle (middle) and in 24 hours (total, right) in vertical sleeve gastrectomy (VSG, red), and weight matched sham (WMS, blue) operated mice.

B. Mean walking/running activity outside the wheel per hour. Colors as in A.

C. Activity as measured by number of beam-crossings per 30 minutes. Colors as in A. n=4,4.

p-values calculated by Student's t-test. No marking corresponds to values greater than 0.05.

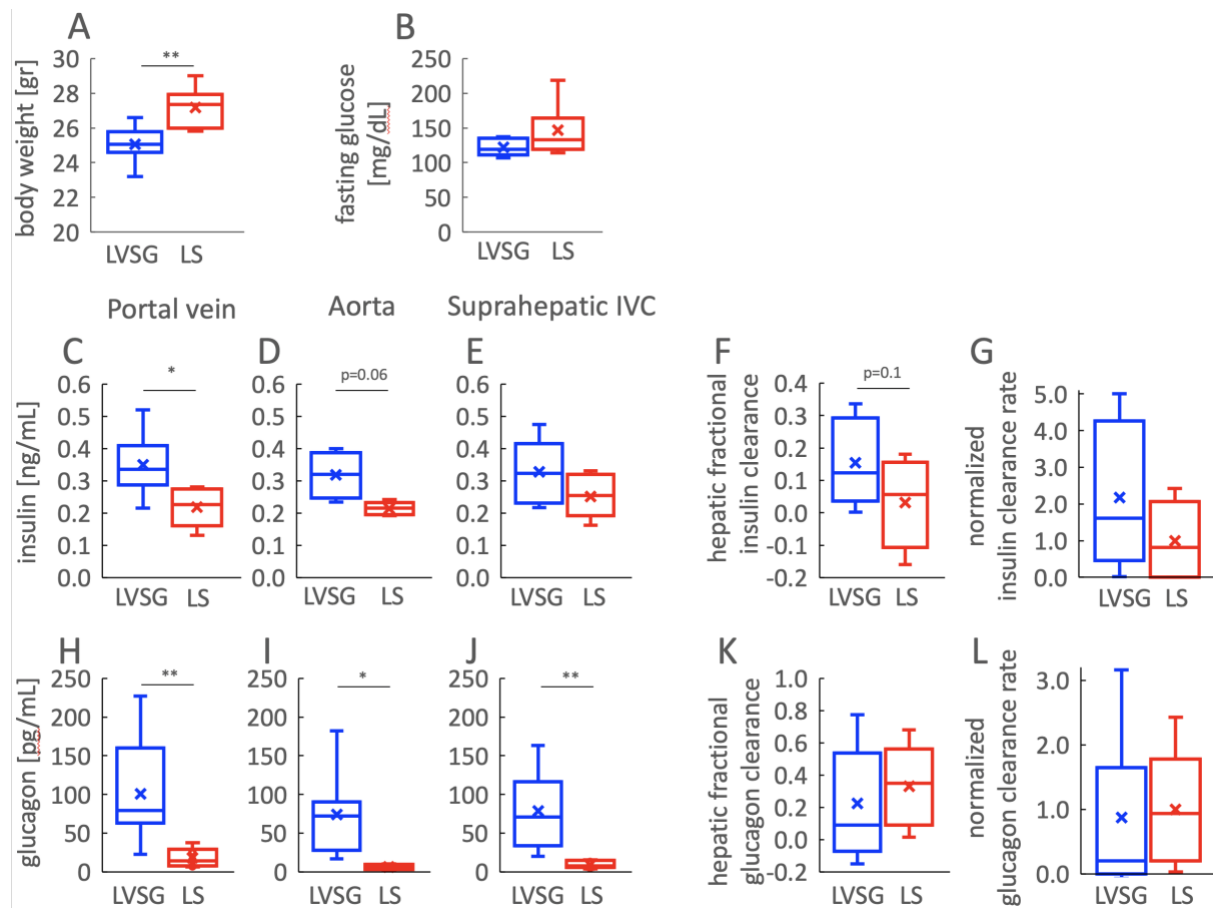

**Figure S2. Fractional insulin and glucagon uptake in C57Bl6 lean sham and lean VSG-operated mice**

A-B. Weight (A) and fasting blood glucose levels (B) of lean VSG (LVSG, bright red) and lean sham (LS, bright blue) operated mice 14 days after surgery.

C-E. Insulin levels in the portal vein (C), aorta (D), and suprahepatic IVC (E) in LVSG and LS-operated mice. Color code as in A.

F. Hepatic fractional insulin clearance in LVSG and LS operated mice.

G. Normalized hepatic insulin clearance rate in LVSG and LS operated mice.

H-J. Glucagon levels in the portal vein (H), aorta (I), and suprahepatic IVC (J) in LVSG and LS operated mice. Color code as in A.

K. Hepatic fractional glucagon clearance in LVSG and LS operated mice. Color code as in A.

L. Normalized glucagon clearance rate in LVSG and LS operated mice. Color code as in A.

n=7,7. \*\*p<0.01. \*p<0.05 by Student's t-test.

|            |                              |
|------------|------------------------------|
| CEACAM1 F2 | CTGCTCACAGCCTCACTTTTAG       |
| CEACAM1 R2 | TATAGCCGTAGTGTTCCCTTGT       |
| HPRT1 F    | GGACCTCTCGAAGTGTTGGA         |
| HPRT1 R    | AAACGTGATTCAAATCCCTGAAGTA    |
| Ide F2     | ACATGGCCTATTTGTACCTTGAG      |
| Ide R2     | TTGGCTGTTTGTCAATTGTAACC      |
| IGF1R F2   | CCAGTTGGCGATTTAGAGAAAC       |
| IGF1R R2   | CTTCAGACACCATCAAGTCCAA       |
| InsR ex11F | TTGTCCCCAGAAAAACCTCTT        |
| InsR ex11R | AAATCTGGAAGTGTGAGTGTGGT      |
| InsR F     | TGGTTGCCCATGATTTTACTG        |
| InsR R     | CCCAAAGGACCACATATCAGAA       |
| IRS1 F     | AGTAAGAGCCATGACAGATAGTACAGT  |
| IRS1 R     | AAGGCAGCATGAGGTAAATATG       |
| PRKCE F    | GGACTGCACAATGACAGAGAAG       |
| PRKCE R    | TTTACATATTCCATGACGAAGAAGAG   |
| TBP F3     | CCTATCACTCCTGCCACACCA        |
| TBP R3     | GTGCAATGGTCTTTAGGTCAAGTTTACA |

**Table S1: primers used in this study**
